# Supplementary material for: Local energy decomposition analysis and molecular properties of encapsulated methane in fullerene (CH 4 @C 60 )
Source: Royal Society of Chemistry journal article supplement (doi:10.1039/d1cp02333k), 2021-01-01
Supplement: d1cp02333k1.pdf [file d1cp02333k1.pdf]

## ELECTRONIC SUPPLEMENTARY INFORMATION

### Local energy decomposition analysis and molecular properties of encapsulated methane in fullerene ( $\text{CH}_4@C_{60}$ )

Aleksander Jaworski,\* Niklas Hedin

Department of Materials and Environmental Chemistry,  
Stockholm University, SE-106 91 Stockholm, Sweden

\*Corresponding author: [aleksander.jaworski@mmk.su.se](mailto:aleksander.jaworski@mmk.su.se)

### Contents

Table S1: DLPNO-CCSD(T) interaction energy and contributions to the correlation binding energy for the  $\text{CH}_4\cdots\text{C}_6\text{H}_6$  dimer

Cartesian coordinates of the models:

Table S2:  $\text{CH}_4$

Table S3:  $C_{60}$

Table S4:  $\text{CH}_4@C_{60}$

Table S5:  $\text{Ng}@C_{60}$  (Ng = He, Ne, Ar, Kr)

Table S6:  $\text{He}_2@C_{60}$

Table S7: Open cage  $C_{60}$

Table S8: Transition state

Table S9:  $\text{CH}_4@$ Open cage  $C_{60}$

Table S10:  $C_{60}$  in 1,2-dichlorobenzene

Table S11:  $\text{CH}_4@C_{60}$  in 1,2-dichlorobenzene

Table S1 DLPNO-CCSD(T) interaction energy and contributions to the correlation binding energy for the CH<sub>4</sub>···C<sub>6</sub>H<sub>6</sub> dimer (results in kcal/mol)

| PNO truncation threshold<br>CH <sub>4</sub> ···C <sub>6</sub> H <sub>6</sub> /CH <sub>4</sub> /C <sub>6</sub> H <sub>6</sub> | Basis set<br>CH <sub>4</sub> /C <sub>6</sub> H <sub>6</sub> | Interaction<br>$\Delta E_{\text{int}}$ | Contribution      |                              |                                                     |
|------------------------------------------------------------------------------------------------------------------------------|-------------------------------------------------------------|----------------------------------------|-------------------|------------------------------|-----------------------------------------------------|
|                                                                                                                              |                                                             |                                        | $E_{\text{disp}}$ | $\Delta E_{\text{non-disp}}$ | $\Delta E_{\text{int}}$ C- (T)<br>(T <sub>0</sub> ) |
| TightPNO/TightPNO/TightPNO                                                                                                   | cc-pV5Z/cc-pV5Z                                             | -1.32                                  | -2.30             | +0.12                        | -0.34                                               |
| TightPNO/TightPNO/TightPNO                                                                                                   | cc-pVQZ/cc-pVQZ                                             | -1.22                                  | -2.28             | +0.19                        | -0.32                                               |
| TightPNO/TightPNO/TightPNO                                                                                                   | cc-pVTZ/cc-pVTZ                                             | -0.97                                  | -2.14             | +0.27                        | -0.27                                               |
| TightPNO/TightPNO/TightPNO                                                                                                   | cc-pVDZ/cc-pVDZ                                             | -0.26                                  | -1.55             | +0.29                        | -0.16                                               |
| TightPNO/NormalPNO/LoosePNO                                                                                                  | cc-pVQZ/cc-pVTZ                                             | -1.34                                  | -2.22             | +0.06                        | -0.34                                               |
|                                                                                                                              |                                                             |                                        |                   |                              | (T <sub>1</sub> )                                   |
| TightPNO/NormalPNO/LoosePNO                                                                                                  | cc-pVQZ/cc-pVTZ                                             | -1.37                                  | -2.22             | +0.06                        | -0.37                                               |

Table S2 Cartesian coordinates (Å) of the CH<sub>4</sub> model

|   |           |           |           |
|---|-----------|-----------|-----------|
| C | -0.009692 | 0.019691  | -0.015120 |
| H | 1.059776  | 0.260548  | -0.136119 |
| H | -0.508055 | 0.829714  | 0.543367  |
| H | -0.112671 | -0.927387 | 0.540625  |
| H | -0.477817 | -0.084107 | -1.008345 |

Table S3 Cartesian coordinates (Å) of the C<sub>60</sub> model

|   |           |           |           |
|---|-----------|-----------|-----------|
| C | 2.235326  | 0.599774  | 2.690663  |
| C | 3.143677  | 0.166118  | 1.641400  |
| C | 1.343573  | -0.314572 | 3.267900  |
| C | 3.127955  | -1.166308 | 1.207160  |
| C | 3.227162  | -1.469517 | -0.211681 |
| C | 3.260791  | 1.245184  | 0.673706  |
| C | 3.356501  | 0.952737  | -0.693769 |
| C | 3.338994  | -0.429529 | -1.144419 |
| C | -0.455528 | 1.382603  | 3.240338  |
| C | 0.470016  | 2.331117  | 2.641271  |
| C | -0.026654 | 0.083815  | 3.547651  |
| C | 1.790556  | 1.946615  | 2.371404  |
| C | 2.424337  | 2.345702  | 1.124924  |
| C | -0.266751 | 3.128055  | 1.673464  |
| C | 0.343753  | 3.512886  | 0.471946  |
| C | 1.714054  | 3.114198  | 0.192549  |
| C | -2.151658 | -0.848864 | 2.692884  |
| C | -2.596793 | 0.498273  | 2.374054  |
| C | -0.890448 | -1.052516 | 3.269412  |
| C | -1.764111 | 1.593416  | 2.642254  |
| C | -1.647781 | 2.672721  | 1.674573  |
| C | -3.343517 | 0.441099  | 1.127553  |
| C | -3.231686 | 1.481087  | 0.194814  |
| C | -2.367804 | 2.617101  | 0.473175  |
| C | -0.509252 | -3.010302 | 1.806755  |
| C | -1.818023 | -2.799234 | 1.209202  |
| C | -0.053976 | -2.153321 | 2.818216  |
| C | -2.624304 | -1.738614 | 1.644336  |
| C | -3.361025 | -0.941167 | 0.676903  |

|   |           |           |           |
|---|-----------|-----------|-----------|
| C | -1.718578 | -3.102628 | -0.209416 |
| C | -2.428861 | -2.334132 | -1.141791 |
| C | -3.265315 | -1.233613 | -0.690573 |
| C | 2.202335  | -2.114850 | 1.805477  |
| C | 1.729859  | -3.004157 | 0.756558  |
| C | 1.326755  | -1.696995 | 2.817149  |
| C | 0.399087  | -3.443762 | 0.757289  |
| C | -0.348276 | -3.501316 | -0.488812 |
| C | 2.363280  | -2.605531 | -0.490042 |
| C | 1.643258  | -2.661151 | -1.691439 |
| C | 0.262228  | -3.116485 | -1.690330 |
| C | -2.239850 | -0.588204 | -2.707529 |
| C | -1.795079 | -1.935045 | -2.388270 |
| C | -0.474539 | -2.319547 | -2.658138 |
| C | -1.348096 | 0.326142  | -3.284767 |
| C | -2.206858 | 2.126420  | -1.822344 |
| C | -3.132478 | 1.177878  | -1.224026 |
| C | -3.148201 | -0.154548 | -1.658266 |
| C | -1.331278 | 1.708565  | -2.834015 |
| C | 0.504729  | 3.021872  | -1.823621 |
| C | -0.403610 | 3.455332  | -0.774156 |
| C | -1.734382 | 3.015727  | -0.773424 |
| C | 0.049453  | 2.164891  | -2.835083 |
| C | 2.147134  | 0.860434  | -2.709750 |
| C | 2.619781  | 1.750184  | -1.661202 |
| C | 1.813499  | 2.810804  | -1.226069 |
| C | 0.885925  | 1.064086  | -3.286278 |
| C | 0.451005  | -1.371033 | -3.257204 |
| C | 1.759587  | -1.581846 | -2.659121 |
| C | 2.592270  | -0.486703 | -2.390921 |
| C | 0.022130  | -0.072245 | -3.564517 |

Table S4 Cartesian coordinates (Å) of the CH<sub>4</sub>@C<sub>60</sub> model

|   |           |           |           |
|---|-----------|-----------|-----------|
| C | -0.008384 | 0.019104  | -0.014555 |
| H | 1.052719  | 0.259455  | -0.135628 |
| H | -0.504974 | 0.823018  | 0.537392  |
| H | -0.112764 | -0.920950 | 0.536739  |
| H | -0.475057 | -0.082168 | -0.999540 |
| C | 2.236504  | 0.600667  | 2.691742  |
| C | 3.145841  | 0.164607  | 1.644032  |
| C | 1.342690  | -0.311591 | 3.268654  |
| C | 3.126335  | -1.167652 | 1.210787  |
| C | 3.227671  | -1.473310 | -0.206739 |
| C | 3.268017  | 1.242550  | 0.675458  |
| C | 3.366195  | 0.948141  | -0.692714 |
| C | 3.346667  | -0.435856 | -1.142035 |
| C | -0.453628 | 1.388628  | 3.239929  |
| C | 0.473573  | 2.334631  | 2.640318  |
| C | -0.026389 | 0.088972  | 3.546861  |
| C | 1.793784  | 1.947124  | 2.370775  |
| C | 2.429607  | 2.343260  | 1.124538  |
| C | -0.261838 | 3.133818  | 1.672733  |
| C | 0.350439  | 3.511159  | 0.469421  |
| C | 1.719859  | 3.109269  | 0.190882  |
| C | -2.149869 | -0.841844 | 2.691338  |
| C | -2.593302 | 0.505449  | 2.371387  |
| C | -0.890858 | -1.046901 | 3.270316  |
| C | -1.762841 | 1.601754  | 2.642685  |

|   |           |           |           |
|---|-----------|-----------|-----------|
| C | -1.645195 | 2.681286  | 1.673406  |
| C | -3.337834 | 0.447300  | 1.124258  |
| C | -3.226143 | 1.485876  | 0.190761  |
| C | -2.363220 | 2.622787  | 0.469354  |
| C | -0.512373 | -3.011480 | 1.813366  |
| C | -1.820621 | -2.798225 | 1.212951  |
| C | -0.056327 | -2.151134 | 2.823087  |
| C | -2.622450 | -1.732438 | 1.644076  |
| C | -3.356101 | -0.935260 | 0.675181  |
| C | -1.719527 | -3.101914 | -0.205667 |
| C | -2.427165 | -2.332893 | -1.140175 |
| C | -3.260773 | -1.230168 | -0.691351 |
| C | 2.198892  | -2.114165 | 1.809539  |
| C | 1.727408  | -3.005532 | 0.762643  |
| C | 1.324527  | -1.695111 | 2.821002  |
| C | 0.396726  | -3.446987 | 0.763917  |
| C | -0.350016 | -3.502857 | -0.483247 |
| C | 2.361913  | -2.608036 | -0.483609 |
| C | 1.641882  | -2.662963 | -1.684149 |
| C | 0.261237  | -3.117770 | -1.684141 |
| C | -2.238606 | -0.590363 | -2.712137 |
| C | -1.794595 | -1.937941 | -2.388665 |
| C | -0.473338 | -2.322881 | -2.654911 |
| C | -1.344503 | 0.323028  | -3.290580 |
| C | -2.198850 | 2.125722  | -1.826152 |
| C | -3.125065 | 1.179383  | -1.227472 |
| C | -3.144305 | -0.153167 | -1.661403 |
| C | -1.324948 | 1.705886  | -2.838502 |
| C | 0.512607  | 3.014249  | -1.824614 |
| C | -0.395489 | 3.451216  | -0.776774 |
| C | -1.727261 | 3.016642  | -0.777732 |
| C | 0.056976  | 2.157554  | -2.835430 |
| C | 2.153429  | 0.853202  | -2.708325 |
| C | 2.628805  | 1.744512  | -1.662186 |
| C | 1.820284  | 2.803279  | -1.226717 |
| C | 0.892388  | 1.056830  | -3.285955 |
| C | 0.454061  | -1.376007 | -3.254302 |
| C | 1.761107  | -1.586299 | -2.653323 |
| C | 2.596724  | -0.493096 | -2.387134 |
| C | 0.027199  | -0.077748 | -3.566665 |

Table S5 Cartesian coordinates ( $\text{\AA}$ ) of the Ng@C<sub>60</sub> model (Ng = He, Ne, Ar, Kr)

|    |           |           |           |
|----|-----------|-----------|-----------|
| Ng | 0.000455  | 0.005628  | -0.007976 |
| C  | 2.236888  | 0.600443  | 2.691828  |
| C  | 3.145152  | 0.164144  | 1.643988  |
| C  | 1.343273  | -0.311816 | 3.268916  |
| C  | 3.127383  | -1.168612 | 1.211381  |
| C  | 3.227261  | -1.473866 | -0.206430 |
| C  | 3.263958  | 1.241366  | 0.675028  |
| C  | 3.360646  | 0.946987  | -0.691679 |
| C  | 3.342166  | -0.435634 | -1.140529 |
| C  | -0.453199 | 1.386849  | 3.236633  |
| C  | 0.473697  | 2.333309  | 2.637930  |
| C  | -0.026334 | 0.088597  | 3.546970  |
| C  | 1.793976  | 1.947151  | 2.370251  |
| C  | 2.428723  | 2.343373  | 1.123873  |
| C  | -0.261150 | 3.130082  | 1.669187  |
| C  | 0.350646  | 3.511960  | 0.467704  |

|   |           |           |           |
|---|-----------|-----------|-----------|
| C | 1.720269  | 3.111381  | 0.190105  |
| C | -2.151884 | -0.842318 | 2.692357  |
| C | -2.594267 | 0.504594  | 2.370565  |
| C | -0.891174 | -1.046431 | 3.269273  |
| C | -1.761138 | 1.599044  | 2.638605  |
| C | -1.642208 | 2.676125  | 1.669341  |
| C | -3.341114 | 0.446987  | 1.124720  |
| C | -3.226239 | 1.485231  | 0.190635  |
| C | -2.361504 | 2.620411  | 0.467964  |
| C | -0.511761 | -3.006499 | 1.810424  |
| C | -1.819507 | -2.794633 | 1.211796  |
| C | -0.056150 | -2.148589 | 2.820453  |
| C | -2.624467 | -1.732368 | 1.644633  |
| C | -3.359638 | -0.935634 | 0.675888  |
| C | -1.719225 | -3.100014 | -0.205909 |
| C | -2.427707 | -2.332032 | -1.139680 |
| C | -3.262895 | -1.230004 | -0.690813 |
| C | 2.200403  | -2.114995 | 1.810174  |
| C | 1.727985  | -3.005466 | 0.762628  |
| C | 1.324856  | -1.694495 | 2.820231  |
| C | 0.396680  | -3.443166 | 0.762781  |
| C | -0.349613 | -3.500589 | -0.483511 |
| C | 2.362551  | -2.609065 | -0.483765 |
| C | 1.643228  | -2.664745 | -1.685123 |
| C | 0.262190  | -3.118728 | -1.684994 |
| C | -2.235849 | -0.589089 | -2.707620 |
| C | -1.792936 | -1.935796 | -2.386051 |
| C | -0.472663 | -2.321959 | -2.653750 |
| C | -1.342233 | 0.323169  | -3.284725 |
| C | -2.199353 | 2.126333  | -1.825962 |
| C | -3.126339 | 1.179966  | -1.227179 |
| C | -3.144127 | -0.152794 | -1.659781 |
| C | -1.323813 | 1.705863  | -2.836038 |
| C | 0.512804  | 3.017900  | -1.826245 |
| C | -0.395640 | 3.454507  | -0.778584 |
| C | -1.726952 | 3.016836  | -0.778427 |
| C | 0.057190  | 2.159926  | -2.836213 |
| C | 2.152896  | 0.853660  | -2.708129 |
| C | 2.625518  | 1.743740  | -1.660439 |
| C | 1.820527  | 2.805974  | -1.227585 |
| C | 0.892216  | 1.057804  | -3.285106 |
| C | 0.454236  | -1.375512 | -3.252465 |
| C | 1.762177  | -1.587705 | -2.654410 |
| C | 2.595285  | -0.493241 | -2.386360 |
| C | 0.027374  | -0.077247 | -3.562749 |

Table S6 Cartesian coordinates (Å) of the He<sub>2</sub>@C<sub>60</sub> model

|    |           |           |           |
|----|-----------|-----------|-----------|
| He | 0.102260  | -0.369146 | 0.883112  |
| He | -0.099949 | 0.378753  | -0.895472 |
| C  | 2.235372  | 0.601624  | 2.697538  |
| C  | 3.143048  | 0.164997  | 1.648840  |
| C  | 1.344195  | -0.310694 | 3.281873  |
| C  | 3.124922  | -1.167877 | 1.218304  |
| C  | 3.225703  | -1.473888 | -0.200076 |
| C  | 3.261917  | 1.240602  | 0.676695  |
| C  | 3.358562  | 0.945559  | -0.690166 |
| C  | 3.339789  | -0.437178 | -1.136581 |
| C  | -0.453566 | 1.388782  | 3.240123  |

|   |           |           |           |
|---|-----------|-----------|-----------|
| C | 0.472762  | 2.334162  | 2.637696  |
| C | -0.027031 | 0.090626  | 3.557808  |
| C | 1.792683  | 1.947813  | 2.371390  |
| C | 2.426770  | 2.342796  | 1.123330  |
| C | -0.260931 | 3.129519  | 1.665760  |
| C | 0.350297  | 3.510586  | 0.463394  |
| C | 1.719638  | 3.109793  | 0.187030  |
| C | -2.151362 | -0.840481 | 2.698748  |
| C | -2.593290 | 0.506041  | 2.372394  |
| C | -0.892852 | -1.046397 | 3.283339  |
| C | -1.760119 | 1.600403  | 2.638183  |
| C | -1.641557 | 2.675906  | 1.666221  |
| C | -3.338535 | 0.447766  | 1.124747  |
| C | -3.224459 | 1.484480  | 0.188245  |
| C | -2.360396 | 2.619976  | 0.464128  |
| C | -0.511825 | -3.005757 | 1.821616  |
| C | -1.818613 | -2.793243 | 1.219577  |
| C | -0.056645 | -2.151084 | 2.836867  |
| C | -2.623780 | -1.730754 | 1.650378  |
| C | -3.357305 | -0.934971 | 0.678330  |
| C | -1.718385 | -3.099206 | -0.198865 |
| C | -2.425520 | -2.332210 | -1.135166 |
| C | -3.260655 | -1.230010 | -0.688530 |
| C | 2.199218  | -2.114043 | 1.820669  |
| C | 1.727160  | -3.004169 | 0.772086  |
| C | 1.326037  | -1.696046 | 2.835899  |
| C | 0.396273  | -3.441887 | 0.772579  |
| C | -0.349045 | -3.499995 | -0.475229 |
| C | 2.361644  | -2.609385 | -0.475961 |
| C | 1.642808  | -2.665320 | -1.678058 |
| C | 0.262181  | -3.118926 | -1.677596 |
| C | -2.234119 | -0.591038 | -2.709375 |
| C | -1.791435 | -1.937230 | -2.383228 |
| C | -0.471510 | -2.323570 | -2.649530 |
| C | -1.342938 | 0.321276  | -3.293709 |
| C | -2.197965 | 2.124628  | -1.832495 |
| C | -3.123671 | 1.178466  | -1.230133 |
| C | -3.141788 | -0.154407 | -1.660672 |
| C | -1.324775 | 1.706619  | -2.847713 |
| C | 0.513079  | 3.016343  | -1.833447 |
| C | -0.395021 | 3.452471  | -0.784412 |
| C | -1.725908 | 3.014757  | -0.783918 |
| C | 0.057902  | 2.161657  | -2.848688 |
| C | 2.152613  | 0.851065  | -2.710583 |
| C | 2.625032  | 1.741340  | -1.662213 |
| C | 1.819867  | 2.803830  | -1.231409 |
| C | 0.894112  | 1.056986  | -3.295197 |
| C | 0.454820  | -1.378197 | -3.251969 |
| C | 1.761374  | -1.589820 | -2.650021 |
| C | 2.594545  | -0.495457 | -2.384229 |
| C | 0.028288  | -0.080041 | -3.569668 |

Table S7 Cartesian coordinates (Å) of the open cage C<sub>60</sub> model

|   |          |           |           |
|---|----------|-----------|-----------|
| C | 2.753183 | -0.456860 | 2.713832  |
| C | 3.340030 | -0.653370 | 1.396278  |
| C | 1.785516 | -1.366109 | 3.169896  |
| C | 3.168850 | -1.893454 | 0.740791  |
| C | 3.161878 | -2.016218 | -0.702177 |

|   |           |           |           |
|---|-----------|-----------|-----------|
| C | 3.559430  | 0.528313  | 0.568071  |
| C | 3.499220  | 0.402955  | -0.824402 |
| C | 3.326623  | -0.873306 | -1.481409 |
| C | -1.276241 | 2.765814  | 4.122426  |
| C | -0.222365 | 3.812128  | 3.544051  |
| C | 0.515242  | -1.052785 | 3.995939  |
| C | 3.278556  | 1.827305  | 1.129365  |
| C | -0.354278 | 3.740701  | 2.041572  |
| C | 0.482014  | 3.855078  | 0.928426  |
| C | 2.581320  | 2.768518  | 0.393510  |
| C | -1.825267 | -1.390645 | 2.916514  |
| C | -2.671576 | 1.069229  | 2.668627  |
| C | -0.567535 | -1.878714 | 3.289442  |
| C | -2.042416 | 2.288318  | 2.945856  |
| C | -1.643734 | 3.117464  | 1.855271  |
| C | -3.052941 | 0.721825  | 1.310528  |
| C | -2.990995 | 1.771866  | 0.352560  |
| C | -2.190980 | 2.936866  | 0.610207  |
| C | -0.554114 | -3.402859 | 1.360067  |
| C | -1.801156 | -2.813288 | 0.923325  |
| C | 0.086098  | -2.823962 | 2.449892  |
| C | -2.367501 | -1.701718 | 1.600001  |
| C | -3.042337 | -0.661877 | 0.809157  |
| C | -1.862255 | -2.963952 | -0.507622 |
| C | -2.520898 | -1.998601 | -1.259523 |
| C | -3.135253 | -0.863992 | -0.600351 |
| C | 2.230319  | -2.859123 | 1.252203  |
| C | 1.589588  | -3.532342 | 0.135766  |
| C | 1.501387  | -2.529646 | 2.393277  |
| C | 0.208569  | -3.792368 | 0.188797  |
| C | -0.614403 | -3.546070 | -0.975402 |
| C | 2.177679  | -3.015225 | -1.082703 |
| C | 1.384801  | -2.815396 | -2.228524 |
| C | -0.040539 | -3.090662 | -2.172047 |
| C | -2.272877 | -0.171395 | -2.695748 |
| C | -1.964911 | -1.575133 | -2.534787 |
| C | -0.729628 | -2.084615 | -2.963936 |
| C | -1.309963 | 0.702503  | -3.237247 |
| C | -1.942704 | 2.443195  | -1.626072 |
| C | -2.927538 | 1.535729  | -1.060966 |
| C | -3.045416 | 0.240926  | -1.541265 |
| C | -1.113196 | 2.013190  | -2.651907 |
| C | 0.866075  | 2.933570  | -1.416993 |
| C | -0.027234 | 3.498344  | -0.399298 |
| C | -1.408653 | 3.238158  | -0.554558 |
| C | 0.310429  | 2.283268  | -2.554548 |
| C | 2.218494  | 0.740769  | -2.742102 |
| C | 2.805602  | 1.402691  | -1.605158 |
| C | 2.175012  | 2.481610  | -0.959247 |
| C | 0.981145  | 1.174837  | -3.209562 |
| C | 0.270233  | -1.182257 | -3.513096 |
| C | 1.572222  | -1.628599 | -3.044287 |
| C | 2.530146  | -0.674365 | -2.671316 |
| C | -0.009557 | 0.189748  | -3.617168 |
| S | -2.598813 | -0.169191 | 3.947132  |
| O | -1.386703 | 2.478736  | 5.299492  |
| O | 0.353188  | -0.219647 | 4.863689  |
| O | 0.434237  | 4.543455  | 4.261161  |

|   |           |           |           |
|---|-----------|-----------|-----------|
| C | 3.634692  | 2.006378  | 2.579026  |
| C | 3.054561  | 0.815174  | 3.438840  |
| C | 2.007082  | 4.036907  | 1.013547  |
| C | 2.504277  | 4.243554  | 2.421122  |
| C | 3.184413  | 3.330122  | 3.128121  |
| O | 2.916100  | 0.937560  | 4.644339  |
| H | 2.223827  | 5.192122  | 2.886398  |
| H | 3.447040  | 3.531496  | 4.172171  |
| N | 5.604206  | 0.575008  | 2.515482  |
| N | 1.397456  | 5.876353  | -0.489288 |
| C | 2.411502  | 5.220493  | 0.136668  |
| C | 1.672428  | 6.918263  | -1.325614 |
| C | 3.004880  | 7.330751  | -1.540720 |
| C | 4.051877  | 6.659987  | -0.883384 |
| C | 3.760242  | 5.580911  | -0.028945 |
| C | 0.486078  | 7.576372  | -2.025265 |
| C | -0.846293 | 6.983480  | -1.501703 |
| C | 0.603346  | 7.301142  | -3.557453 |
| C | 0.506651  | 9.112807  | -1.768885 |
| H | 0.588857  | 6.209894  | -3.751997 |
| H | 1.542453  | 7.722758  | -3.968884 |
| H | -0.253090 | 7.768082  | -4.085261 |
| H | 0.451662  | 9.323275  | -0.681844 |
| H | -0.367451 | 9.581978  | -2.264491 |
| H | 1.425374  | 9.580698  | -2.174854 |
| H | -0.889968 | 5.893841  | -1.677966 |
| H | -0.947353 | 7.149341  | -0.412046 |
| H | -1.692741 | 7.473665  | -2.024213 |
| H | 3.224590  | 8.165038  | -2.216300 |
| H | 5.091672  | 6.972518  | -1.042786 |
| H | 4.551071  | 5.025565  | 0.490214  |
| C | 6.937622  | 0.291487  | 2.549368  |
| C | 7.876731  | 1.321159  | 2.763778  |
| C | 5.160414  | 1.848716  | 2.678306  |
| C | 7.420706  | 2.642891  | 2.926889  |
| C | 6.042517  | 2.925151  | 2.881455  |
| H | 5.664894  | 3.946599  | 3.000384  |
| H | 8.140999  | 3.454758  | 3.089681  |
| H | 8.947602  | 1.099757  | 2.802259  |
| C | 7.286072  | -1.174348 | 2.304623  |
| C | 8.783740  | -1.471375 | 2.564829  |
| C | 6.940648  | -1.495247 | 0.816413  |
| C | 6.403334  | -2.061621 | 3.231348  |
| H | 9.437217  | -0.908499 | 1.867496  |
| H | 8.974263  | -2.551976 | 2.408237  |
| H | 9.065601  | -1.219659 | 3.607833  |
| H | 7.551060  | -0.872698 | 0.131035  |
| H | 5.871953  | -1.293984 | 0.627208  |
| H | 7.148260  | -2.564353 | 0.607595  |
| H | 6.620942  | -1.848380 | 4.297534  |
| H | 6.614565  | -3.131408 | 3.031025  |
| H | 5.334971  | -1.857512 | 3.041387  |

Table S8 Cartesian coordinates (Å) of the transition state model

|   |           |          |          |
|---|-----------|----------|----------|
| C | 0.451337  | 1.523183 | 3.738517 |
| H | 0.702803  | 0.932497 | 2.845404 |
| H | -0.553694 | 1.259579 | 4.075973 |
| H | 0.552761  | 2.573169 | 3.474252 |



|   |           |           |           |
|---|-----------|-----------|-----------|
| H | 1.131034  | 1.324586  | 4.571472  |
| S | -2.653613 | 0.017440  | 3.853642  |
| O | -2.096170 | 3.173645  | 5.124565  |
| O | 0.412614  | -0.835002 | 5.341642  |
| O | -0.097184 | 5.082212  | 3.999571  |
| O | 3.373132  | 0.661943  | 4.786330  |
| C | -1.796133 | 3.250332  | 3.948136  |
| C | -0.681931 | 4.240012  | 3.343047  |
| C | 0.497398  | -1.286917 | 4.222073  |
| C | 3.193347  | 0.624195  | 3.581389  |
| C | 2.285744  | 4.075776  | 2.515919  |
| C | 2.994392  | 3.182598  | 3.228828  |
| H | 1.958312  | 5.006728  | 2.989238  |
| H | 3.236235  | 3.392127  | 4.277595  |
| C | 2.745670  | -0.623056 | 2.870370  |
| C | 3.279998  | -0.807324 | 1.528284  |
| C | 1.756847  | -1.512960 | 3.326351  |
| C | 3.108445  | -2.047120 | 0.872880  |
| C | 3.111432  | -2.174380 | -0.568897 |
| C | 3.462013  | 0.379104  | 0.698237  |
| C | 3.433993  | 0.245986  | -0.693301 |
| C | 3.290873  | -1.034628 | -1.349288 |
| C | 3.129737  | 1.674411  | 1.245749  |
| C | -0.628545 | 3.932335  | 1.869104  |
| C | 0.326164  | 3.855797  | 0.847815  |
| C | 2.430333  | 2.603426  | 0.491702  |
| C | -1.849175 | -1.265486 | 2.899839  |
| C | -2.814487 | 1.219431  | 2.533897  |
| C | -0.638053 | -1.831788 | 3.326725  |
| C | -2.343465 | 2.522636  | 2.771328  |
| C | -1.898823 | 3.282406  | 1.644544  |
| C | -3.128393 | 0.783356  | 1.181399  |
| C | -3.094337 | 1.783746  | 0.167781  |
| C | -2.340550 | 2.982496  | 0.387182  |
| C | -0.656505 | -3.407695 | 1.432556  |
| C | -1.869503 | -2.784804 | 0.960983  |
| C | -0.018285 | -2.830369 | 2.518354  |
| C | -2.395541 | -1.623909 | 1.588518  |
| C | -3.067662 | -0.621003 | 0.746582  |
| C | -1.921042 | -2.998677 | -0.463106 |
| C | -2.550476 | -2.055296 | -1.261132 |
| C | -3.159144 | -0.890765 | -0.654531 |
| C | 2.145945  | -2.991989 | 1.377912  |
| C | 1.501242  | -3.652261 | 0.256719  |
| C | 1.415078  | -2.631473 | 2.506960  |
| C | 0.112247  | -3.865999 | 0.289973  |
| C | -0.683378 | -3.629946 | -0.893213 |
| C | 2.121128  | -3.164420 | -0.957506 |
| C | 1.354369  | -2.970018 | -2.121909 |
| C | -0.076160 | -3.221451 | -2.091684 |
| C | -2.262703 | -0.293104 | -2.764367 |
| C | -1.969669 | -1.690982 | -2.544028 |
| C | -0.730957 | -2.227568 | -2.926448 |
| C | -1.275982 | 0.555395  | -3.304174 |
| C | -1.964685 | 2.363954  | -1.792774 |
| C | -2.972857 | 1.481334  | -1.228017 |
| C | -3.063585 | 0.166250  | -1.647696 |
| C | -1.090230 | 1.882861  | -2.754235 |

|   |           |           |           |
|---|-----------|-----------|-----------|
| C | 0.832370  | 2.794883  | -1.426902 |
| C | -0.100851 | 3.426693  | -0.489498 |
| C | -1.479445 | 3.207278  | -0.735646 |
| C | 0.329380  | 2.134180  | -2.585898 |
| C | 2.224104  | 0.569363  | -2.657154 |
| C | 2.758113  | 1.237019  | -1.497335 |
| C | 2.096323  | 2.316024  | -0.881926 |
| C | 1.014547  | 1.005601  | -3.186680 |
| C | 0.294717  | -1.350740 | -3.470591 |
| C | 1.577141  | -1.799685 | -2.952711 |
| C | 2.529633  | -0.845466 | -2.563134 |
| C | 0.032743  | 0.020580  | -3.617059 |
| C | 3.533653  | 1.890735  | 2.677602  |
| C | 1.862157  | 3.897909  | 1.073328  |
| N | 1.464755  | 5.834163  | -0.357639 |
| N | 5.608602  | 0.664827  | 2.451992  |
| C | 2.407841  | 5.058038  | 0.240796  |
| C | 1.842385  | 6.875929  | -1.152810 |
| C | 3.209725  | 7.163170  | -1.352391 |
| C | 4.183716  | 6.366068  | -0.723913 |
| C | 3.786016  | 5.287405  | 0.087597  |
| C | 0.726452  | 7.672034  | -1.823579 |
| C | -0.657843 | 7.173234  | -1.336464 |
| C | 0.833453  | 7.467488  | -3.367544 |
| C | 0.881449  | 9.185217  | -1.486749 |
| H | 0.728033  | 6.393129  | -3.619524 |
| H | 1.808461  | 7.828282  | -3.752411 |
| H | 0.024856  | 8.032688  | -3.874242 |
| H | 0.829992  | 9.343202  | -0.390743 |
| H | 0.060040  | 9.756072  | -1.965484 |
| H | 1.844607  | 9.587994  | -1.858514 |
| H | -0.789797 | 6.098175  | -1.556519 |
| H | -0.757701 | 7.304354  | -0.242010 |
| H | -1.453555 | 7.753673  | -1.846018 |
| H | 3.512391  | 7.997692  | -1.994847 |
| H | 5.249658  | 6.579802  | -0.873600 |
| H | 4.518056  | 4.635555  | 0.579377  |
| C | 6.958599  | 0.497415  | 2.376243  |
| C | 7.819001  | 1.605666  | 2.524769  |
| C | 5.071775  | 1.894685  | 2.663085  |
| C | 7.264989  | 2.881023  | 2.742725  |
| C | 5.867233  | 3.043440  | 2.811017  |
| H | 5.413116  | 4.025499  | 2.982058  |
| H | 7.923399  | 3.750897  | 2.861993  |
| H | 8.904613  | 1.478697  | 2.473808  |
| C | 7.407402  | -0.934335 | 2.097661  |
| C | 8.943251  | -1.098566 | 2.209002  |
| C | 6.944875  | -1.299767 | 0.652324  |
| C | 6.699534  | -1.883828 | 3.109618  |
| H | 9.473307  | -0.482827 | 1.453950  |
| H | 9.211486  | -2.158925 | 2.029780  |
| H | 9.302023  | -0.819022 | 3.220790  |
| H | 7.434491  | -0.640680 | -0.093263 |
| H | 5.850351  | -1.184222 | 0.565677  |
| H | 7.215838  | -2.351725 | 0.429765  |
| H | 7.003893  | -1.643188 | 4.148380  |
| H | 6.979508  | -2.933925 | 2.890001  |
| H | 5.603641  | -1.771490 | 3.027890  |

Table S9 Cartesian coordinates (Å) of the CH<sub>4</sub>@Open cage C<sub>60</sub> model

|   |           |           |           |
|---|-----------|-----------|-----------|
| C | 0.144702  | -0.139137 | -0.029401 |
| H | 1.182745  | 0.147513  | -0.223007 |
| H | -0.265606 | -0.652275 | -0.906981 |
| H | -0.445895 | 0.762962  | 0.181846  |
| H | 0.113490  | -0.805721 | 0.840827  |
| C | 2.732625  | -0.424832 | 2.698781  |
| C | 3.338561  | -0.652003 | 1.395011  |
| C | 1.753639  | -1.318935 | 3.161913  |
| C | 3.163386  | -1.902380 | 0.763210  |
| C | 3.168950  | -2.052541 | -0.676564 |
| C | 3.584522  | 0.510820  | 0.545603  |
| C | 3.535694  | 0.361473  | -0.846171 |
| C | 3.351127  | -0.927324 | -1.477198 |
| C | -1.274581 | 2.794761  | 4.036198  |
| C | -0.201120 | 3.817742  | 3.449426  |
| C | 0.476208  | -0.987000 | 3.968996  |
| C | 3.307144  | 1.821566  | 1.079790  |
| C | -0.325525 | 3.729949  | 1.947233  |
| C | 0.514081  | 3.837529  | 0.835935  |
| C | 2.618993  | 2.752189  | 0.322438  |
| C | -1.860959 | -1.362527 | 2.890245  |
| C | -2.681276 | 1.091666  | 2.596789  |
| C | -0.601479 | -1.834473 | 3.277578  |
| C | -2.034010 | 2.303708  | 2.860109  |
| C | -1.615796 | 3.110387  | 1.760845  |
| C | -3.055162 | 0.726485  | 1.241155  |
| C | -2.970875 | 1.761535  | 0.269034  |
| C | -2.160828 | 2.922407  | 0.516351  |
| C | -0.573159 | -3.394635 | 1.378357  |
| C | -1.818808 | -2.816408 | 0.921212  |
| C | 0.059592  | -2.794731 | 2.461573  |
| C | -2.393755 | -1.696091 | 1.575298  |
| C | -3.053780 | -0.664721 | 0.761121  |
| C | -1.863581 | -2.987125 | -0.508256 |
| C | -2.513229 | -2.033461 | -1.282858 |
| C | -3.128118 | -0.885975 | -0.646567 |
| C | 2.214996  | -2.852634 | 1.283971  |
| C | 1.581703  | -3.544147 | 0.175887  |
| C | 1.475770  | -2.499774 | 2.410530  |
| C | 0.200519  | -3.802675 | 0.221139  |
| C | -0.610936 | -3.575061 | -0.954146 |
| C | 2.183025  | -3.053125 | -1.045910 |
| C | 1.401538  | -2.873558 | -2.201623 |
| C | -0.024831 | -3.145129 | -2.153922 |
| C | -2.239502 | -0.228827 | -2.743341 |
| C | -1.942029 | -1.632316 | -2.559839 |
| C | -0.703662 | -2.151980 | -2.969965 |
| C | -1.266370 | 0.631600  | -3.288010 |
| C | -1.901354 | 2.397631  | -1.709182 |
| C | -2.896476 | 1.504588  | -1.139617 |
| C | -3.020039 | 0.204173  | -1.602005 |
| C | -1.066260 | 1.949327  | -2.721305 |
| C | 0.911509  | 2.889784  | -1.496088 |
| C | 0.012051  | 3.464796  | -0.489479 |
| C | -1.369636 | 3.205177  | -0.647120 |
| C | 0.356796  | 2.217093  | -2.620755 |

|   |           |           |           |
|---|-----------|-----------|-----------|
| C | 2.260847  | 0.668014  | -2.774159 |
| C | 2.851898  | 1.351984  | -1.651411 |
| C | 2.220972  | 2.445379  | -1.028312 |
| C | 1.026395  | 1.096394  | -3.253603 |
| C | 0.305738  | -1.262174 | -3.524751 |
| C | 1.601364  | -1.703604 | -3.036549 |
| C | 2.561334  | -0.747096 | -2.673662 |
| C | 0.033928  | 0.108816  | -3.651260 |
| S | -2.644503 | -0.126541 | 3.895445  |
| O | -1.405283 | 2.536395  | 5.217514  |
| O | 0.306200  | -0.130174 | 4.811651  |
| O | 0.462417  | 4.547587  | 4.161431  |
| C | 3.647824  | 2.023080  | 2.530260  |
| C | 3.035409  | 0.857890  | 3.403193  |
| C | 2.038515  | 4.026803  | 0.919890  |
| C | 2.532614  | 4.262988  | 2.323831  |
| C | 3.208611  | 3.362102  | 3.050220  |
| O | 2.876112  | 1.007176  | 4.603067  |
| H | 2.252426  | 5.221941  | 2.767364  |
| H | 3.468963  | 3.583204  | 4.090726  |
| N | 5.597763  | 0.562628  | 2.512509  |
| N | 1.389815  | 5.912021  | -0.495150 |
| C | 2.426041  | 5.203673  | 0.029656  |
| C | 1.635750  | 6.963687  | -1.328021 |
| C | 2.961442  | 7.330484  | -1.644487 |
| C | 4.031957  | 6.606226  | -1.089478 |
| C | 3.769694  | 5.518508  | -0.236186 |
| C | 0.421954  | 7.684555  | -1.908462 |
| C | -0.885037 | 7.109307  | -1.306327 |
| C | 0.412812  | 7.471964  | -3.454803 |
| C | 0.512966  | 9.207403  | -1.592230 |
| H | 0.353265  | 6.390734  | -3.692000 |
| H | 1.328181  | 7.887949  | -3.921483 |
| H | -0.468535 | 7.981701  | -3.894659 |
| H | 0.538880  | 9.372433  | -0.496310 |
| H | -0.375922 | 9.724766  | -2.006958 |
| H | 1.418525  | 9.662338  | -2.040620 |
| H | -0.972844 | 6.027415  | -1.513583 |
| H | -0.900037 | 7.240262  | -0.207429 |
| H | -1.753077 | 7.639933  | -1.747610 |
| H | 3.157498  | 8.171055  | -2.319640 |
| H | 5.066507  | 6.883974  | -1.327840 |
| H | 4.577910  | 4.922729  | 0.205770  |
| C | 6.926013  | 0.260112  | 2.572081  |
| C | 7.876158  | 1.278535  | 2.791218  |
| C | 5.169422  | 1.844058  | 2.654102  |
| C | 7.436620  | 2.608416  | 2.931575  |
| C | 6.063640  | 2.910020  | 2.859814  |
| H | 5.699584  | 3.938235  | 2.960785  |
| H | 8.165761  | 3.411779  | 3.097095  |
| H | 8.942917  | 1.042339  | 2.850417  |
| C | 7.257090  | -1.213328 | 2.350024  |
| C | 8.746106  | -1.528340 | 2.637067  |
| C | 6.930621  | -1.547585 | 0.860503  |
| C | 6.347369  | -2.076686 | 3.273270  |
| H | 9.418001  | -0.982080 | 1.944061  |
| H | 8.923724  | -2.613111 | 2.494901  |
| H | 9.015349  | -1.269336 | 3.681614  |

|   |          |           |          |
|---|----------|-----------|----------|
| H | 7.562365 | -0.944011 | 0.177497 |
| H | 5.868715 | -1.331515 | 0.650744 |
| H | 7.123947 | -2.622522 | 0.668692 |
| H | 6.550138 | -1.852461 | 4.340125 |
| H | 6.547535 | -3.151678 | 3.090238 |
| H | 5.285165 | -1.861272 | 3.062756 |

Table S10 Cartesian coordinates (Å) of the C<sub>60</sub> in 1,2-dichlorobenzene model

|   |           |           |           |
|---|-----------|-----------|-----------|
| C | 2.043700  | 0.955409  | 2.205716  |
| C | 2.848321  | 0.635438  | 1.039383  |
| C | 1.175755  | -0.002433 | 2.747136  |
| C | 2.735698  | -0.632858 | 0.454063  |
| C | 2.683749  | -0.767103 | -0.987450 |
| C | 2.897078  | 1.814860  | 0.195302  |
| C | 2.853585  | 1.685419  | -1.197611 |
| C | 2.748433  | 0.368370  | -1.798938 |
| C | -0.561962 | 1.712298  | 3.095694  |
| C | 0.330115  | 2.710481  | 2.531901  |
| C | -0.144078 | 0.381418  | 3.206113  |
| C | 1.607343  | 2.336112  | 2.090922  |
| C | 2.126072  | 2.859108  | 0.842490  |
| C | -0.472187 | 3.627998  | 1.741016  |
| C | 0.031923  | 4.117713  | 0.532210  |
| C | 1.355663  | 3.745403  | 0.082350  |
| C | -2.357852 | -0.403730 | 2.458514  |
| C | -2.793309 | 0.977578  | 2.341824  |
| C | -1.059512 | -0.700410 | 2.889124  |
| C | -1.913073 | 2.019622  | 2.662120  |
| C | -1.857171 | 3.203561  | 1.822742  |
| C | -3.668269 | 1.082534  | 1.187314  |
| C | -3.600665 | 2.219538  | 0.372433  |
| C | -2.685685 | 3.300125  | 0.696467  |
| C | -0.874308 | -2.469202 | 1.181101  |
| C | -2.224408 | -2.170660 | 0.740384  |
| C | -0.303506 | -1.758716 | 2.243363  |
| C | -2.951651 | -1.149625 | 1.365132  |
| C | -3.760480 | -0.235581 | 0.581155  |
| C | -2.263384 | -2.302261 | -0.702897 |
| C | -3.035124 | -1.419354 | -1.464979 |
| C | -3.787356 | -0.365247 | -0.811717 |
| C | 1.837642  | -1.620966 | 1.019865  |
| C | 1.248900  | -2.371649 | -0.071921 |
| C | 1.079318  | -1.324202 | 2.156327  |
| C | -0.082277 | -2.791001 | 0.006713  |
| C | -0.938946 | -2.686653 | -1.155839 |
| C | 1.775727  | -1.848526 | -1.314481 |
| C | 0.950142  | -1.755968 | -2.439407 |
| C | -0.433069 | -2.189506 | -2.362082 |
| C | -2.942859 | 0.491598  | -2.826352 |
| C | -2.510344 | -0.889284 | -2.710533 |
| C | -1.235494 | -1.265691 | -3.147289 |
| C | -2.085295 | 1.452369  | -3.374463 |
| C | -2.750947 | 3.077834  | -1.641479 |
| C | -3.646397 | 2.087463  | -1.073371 |
| C | -3.726344 | 0.817348  | -1.650469 |
| C | -1.987552 | 2.768515  | -2.773287 |
| C | -0.031424 | 3.925530  | -1.804461 |
| C | -0.824663 | 4.240694  | -0.628422 |

|    |           |           |           |
|----|-----------|-----------|-----------|
| C  | -2.161134 | 3.831136  | -0.550379 |
| C  | -0.604098 | 3.200953  | -2.857565 |
| C  | 1.455190  | 1.851119  | -3.080410 |
| C  | 2.044930  | 2.598882  | -1.985159 |
| C  | 1.316931  | 3.618313  | -1.362676 |
| C  | 0.154741  | 2.148006  | -3.511748 |
| C  | -0.343165 | -0.264333 | -3.704611 |
| C  | 1.006534  | -0.570199 | -3.275419 |
| C  | 1.887337  | 0.470024  | -2.962532 |
| C  | -0.761481 | 1.067024  | -3.826956 |
| C1 | 5.774083  | 2.206310  | 6.590966  |
| C1 | 7.410617  | -0.249251 | 5.152119  |
| C  | 4.357043  | -2.180147 | 7.117151  |
| C  | 5.476960  | -1.907151 | 6.307050  |
| C  | 3.695308  | -1.131939 | 7.786221  |
| C  | 5.912886  | -0.585259 | 6.171731  |
| C  | 4.136459  | 0.196906  | 7.630762  |
| C  | 5.238418  | 0.455111  | 6.810715  |
| H  | 4.001204  | -3.211312 | 7.214406  |
| H  | 6.007594  | -2.709423 | 5.783584  |
| H  | 2.827470  | -1.338181 | 8.421163  |
| H  | 3.638218  | 1.024628  | 8.144754  |
| C1 | -7.356360 | 3.012665  | 2.307158  |
| C1 | -9.544405 | 2.804238  | -0.115516 |
| C  | -6.379261 | 4.749319  | -1.880176 |
| C  | -7.618740 | 4.116553  | -1.661589 |
| C  | -5.456936 | 4.874345  | -0.825525 |
| C  | -7.910024 | 3.609074  | -0.391377 |
| C  | -5.766794 | 4.369575  | 0.451918  |
| C  | -6.990200 | 3.720259  | 0.652520  |
| H  | -6.137730 | 5.148273  | -2.869957 |
| H  | -8.353963 | 4.013131  | -2.467189 |
| H  | -4.495391 | 5.365888  | -0.992669 |
| H  | -5.072737 | 4.493552  | 1.287567  |
| C1 | -3.849720 | 2.362890  | 9.052380  |
| C1 | -4.596923 | 5.426065  | 8.119828  |
| C  | -1.591595 | 4.357681  | 5.535657  |
| C  | -2.614328 | 5.069576  | 6.189786  |
| C  | -1.253081 | 3.061380  | 5.958088  |
| C  | -3.287706 | 4.469900  | 7.259229  |
| C  | -1.946101 | 2.463838  | 7.024609  |
| C  | -2.962441 | 3.177261  | 7.665033  |
| H  | -1.068100 | 4.820663  | 4.693983  |
| H  | -2.893271 | 6.079204  | 5.871487  |
| H  | -0.448380 | 2.515528  | 5.461663  |
| H  | -1.704807 | 1.455733  | 7.365767  |
| C1 | -9.456238 | -2.225710 | 1.774137  |
| C1 | -6.877422 | -0.645123 | 3.020433  |
| C  | -5.245246 | -4.156367 | 1.638251  |
| C  | -5.419041 | -2.898051 | 2.243651  |
| C  | -6.354175 | -4.840958 | 1.106276  |
| C  | -6.690990 | -2.320542 | 2.285941  |
| C  | -7.637259 | -4.260214 | 1.172431  |
| C  | -7.791551 | -2.995397 | 1.755472  |
| H  | -4.242512 | -4.587988 | 1.587219  |
| H  | -4.565240 | -2.374759 | 2.676073  |
| H  | -6.227874 | -5.823041 | 0.639620  |
| H  | -8.511964 | -4.773094 | 0.756862  |

|    |           |           |           |
|----|-----------|-----------|-----------|
| C1 | -2.497689 | 6.595995  | 2.879227  |
| C1 | -2.809271 | 7.348020  | -0.261984 |
| C  | 1.252315  | 7.018359  | 0.190034  |
| C  | -0.031275 | 7.184757  | -0.362967 |
| C  | 1.398472  | 6.758953  | 1.566881  |
| C  | -1.149696 | 7.080462  | 0.468596  |
| C  | 0.262964  | 6.638144  | 2.390140  |
| C  | -1.006297 | 6.793245  | 1.823085  |
| H  | 2.130558  | 7.115673  | -0.454051 |
| H  | -0.167896 | 7.399628  | -1.426275 |
| H  | 2.398055  | 6.655519  | 2.001862  |
| H  | 0.359690  | 6.425781  | 3.460334  |
| C1 | 0.242025  | 0.241834  | 9.083342  |
| C1 | 0.879015  | -0.778404 | 6.038528  |
| C  | 2.317051  | 3.065219  | 6.053386  |
| C  | 1.983926  | 1.755976  | 5.662194  |
| C  | 1.993363  | 3.525344  | 7.343516  |
| C  | 1.324178  | 0.919508  | 6.567074  |
| C  | 1.350211  | 2.665743  | 8.254665  |
| C  | 1.028543  | 1.365883  | 7.852328  |
| H  | 2.835769  | 3.720745  | 5.347623  |
| H  | 2.249192  | 1.383135  | 4.669697  |
| H  | 2.245733  | 4.546758  | 7.650606  |
| H  | 1.100028  | 2.998543  | 9.268105  |
| C1 | -2.242539 | -3.354350 | -5.976801 |
| C1 | -5.167262 | -3.575031 | -7.434816 |
| C  | -4.663276 | 0.477856  | -6.937498 |
| C  | -5.189306 | -0.779535 | -7.299339 |
| C  | -3.397611 | 0.560266  | -6.329788 |
| C  | -4.449336 | -1.934465 | -7.017477 |
| C  | -2.657162 | -0.606115 | -6.079591 |
| C  | -3.202097 | -1.848156 | -6.402101 |
| H  | -5.248714 | 1.385430  | -7.123293 |
| H  | -6.172236 | -0.867736 | -7.775428 |
| H  | -2.980263 | 1.526287  | -6.039465 |
| H  | -1.663325 | -0.550309 | -5.634381 |
| C1 | 2.252572  | -3.744860 | 4.763517  |
| C1 | 4.563561  | -5.910046 | 4.006105  |
| C  | 6.102233  | -2.377536 | 2.592154  |
| C  | 5.951089  | -3.729487 | 2.955399  |
| C  | 5.089925  | -1.446862 | 2.900377  |
| C  | 4.780105  | -4.135307 | 3.605541  |
| C  | 3.936530  | -1.864156 | 3.586364  |
| C  | 3.784332  | -3.213627 | 3.915294  |
| H  | 7.018628  | -2.049759 | 2.089692  |
| H  | 6.725457  | -4.468291 | 2.721718  |
| H  | 5.201791  | -0.394053 | 2.628907  |
| H  | 3.166153  | -1.149141 | 3.883083  |
| C1 | 2.742070  | 3.671799  | -7.542354 |
| C1 | 3.039003  | 6.848709  | -6.734656 |
| C  | 6.574513  | 5.210585  | -5.437540 |
| C  | 5.528801  | 6.113413  | -5.711901 |
| C  | 6.477021  | 3.866469  | -5.846097 |
| C  | 4.388659  | 5.651152  | -6.375223 |
| C  | 5.322947  | 3.414117  | -6.513464 |
| C  | 4.279726  | 4.313051  | -6.754515 |
| H  | 7.463645  | 5.560827  | -4.899939 |
| H  | 5.591003  | 7.162780  | -5.401391 |

|    |           |           |           |
|----|-----------|-----------|-----------|
| H  | 7.289264  | 3.157629  | -5.648503 |
| H  | 5.232688  | 2.374167  | -6.838213 |
| C1 | -7.856766 | 5.153500  | 6.260317  |
| C1 | -5.673756 | 6.077494  | 4.018105  |
| C  | -4.422659 | 2.304314  | 5.035808  |
| C  | -4.524256 | 3.562869  | 4.423242  |
| C  | -5.351033 | 1.909862  | 6.014782  |
| C  | -5.558753 | 4.418635  | 4.806947  |
| C  | -6.394539 | 2.776426  | 6.383739  |
| C  | -6.487647 | 4.028598  | 5.767015  |
| H  | -3.601436 | 1.646662  | 4.753754  |
| H  | -3.810537 | 3.871804  | 3.655176  |
| H  | -5.255323 | 0.936000  | 6.503457  |
| H  | -7.123295 | 2.493498  | 7.151152  |
| C1 | 7.919056  | 5.907104  | 0.524491  |
| C1 | 5.182267  | 7.486561  | 1.288510  |
| C  | 6.049568  | 5.415336  | 4.734835  |
| C  | 5.452491  | 6.290973  | 3.806195  |
| C  | 7.182477  | 4.663770  | 4.368791  |
| C  | 6.009908  | 6.408913  | 2.530129  |
| C  | 7.738203  | 4.799113  | 3.081758  |
| C  | 7.149356  | 5.687038  | 2.178906  |
| H  | 5.618360  | 5.318146  | 5.738125  |
| H  | 4.560221  | 6.871878  | 4.067475  |
| H  | 7.638535  | 3.963852  | 5.077178  |
| H  | 8.621191  | 4.223315  | 2.784193  |
| C1 | -0.165047 | -3.838223 | 7.250335  |
| C1 | 1.369459  | -6.721470 | 7.025331  |
| C  | -2.609818 | -7.763708 | 6.981400  |
| C  | -1.201324 | -7.820721 | 6.956976  |
| C  | -3.264474 | -6.523751 | 7.083822  |
| C  | -0.467552 | -6.633739 | 7.043246  |
| C  | -2.513295 | -5.335841 | 7.146970  |
| C  | -1.119044 | -5.403580 | 7.133188  |
| H  | -3.186603 | -8.692966 | 6.916939  |
| H  | -0.676058 | -8.778591 | 6.870507  |
| H  | -4.357662 | -6.468627 | 7.113706  |
| H  | -2.999719 | -4.362963 | 7.201799  |
| C1 | -2.324733 | 5.894929  | -3.270460 |
| C1 | -4.378439 | 3.833512  | -4.819100 |
| C  | -1.399731 | 4.463515  | -7.573011 |
| C  | -2.575268 | 4.019943  | -6.935983 |
| C  | -0.491720 | 5.288644  | -6.881647 |
| C  | -2.832347 | 4.417237  | -5.619470 |
| C  | -0.771572 | 5.686509  | -5.561745 |
| C  | -1.949150 | 5.254861  | -4.945255 |
| H  | -1.206286 | 4.164517  | -8.609213 |
| H  | -3.285768 | 3.382150  | -7.470866 |
| H  | 0.426686  | 5.634528  | -7.365960 |
| H  | -0.096022 | 6.353925  | -5.021159 |
| C1 | 0.842287  | -4.916399 | -5.256800 |
| C1 | 1.765463  | -5.103587 | -2.124490 |
| C  | -1.098178 | -8.034459 | -2.424935 |
| C  | -0.092264 | -7.180138 | -1.935274 |
| C  | -1.506902 | -7.946661 | -3.769988 |
| C  | 0.485781  | -6.240269 | -2.795052 |
| C  | -0.909173 | -7.004290 | -4.629431 |
| C  | 0.085270  | -6.157518 | -4.127699 |



|    |           |           |           |
|----|-----------|-----------|-----------|
| H  | -1.563221 | -8.761654 | -1.749651 |
| H  | 0.239960  | -7.239136 | -0.896942 |
| H  | -2.295609 | -8.603985 | -4.154390 |
| H  | -1.219164 | -6.915751 | -5.676896 |
| C1 | 8.044052  | 0.849789  | 1.586166  |
| C1 | 7.441992  | 2.727513  | -1.006691 |
| C  | 4.603975  | 3.945905  | 1.711814  |
| C  | 5.359388  | 3.801283  | 0.533787  |
| C  | 4.860007  | 3.130206  | 2.823430  |
| C  | 6.386453  | 2.858975  | 0.500821  |
| C  | 5.890544  | 2.175380  | 2.775391  |
| C  | 6.650636  | 2.056518  | 1.610035  |
| H  | 3.821617  | 4.708208  | 1.747901  |
| H  | 5.155490  | 4.426973  | -0.337476 |
| H  | 4.289666  | 3.251426  | 3.747198  |
| H  | 6.136766  | 1.571108  | 3.651993  |
| C1 | -3.244386 | -2.654372 | 9.418610  |
| C1 | -5.953967 | -3.551297 | 7.791721  |
| C  | -4.066493 | -1.019694 | 5.166159  |
| C  | -5.011092 | -1.867225 | 5.772115  |
| C  | -2.862375 | -0.714941 | 5.823695  |
| C  | -4.744213 | -2.384316 | 7.042554  |
| C  | -2.616554 | -1.222030 | 7.112006  |
| C  | -3.573462 | -2.039576 | 7.718451  |
| H  | -4.283437 | -0.601955 | 4.180274  |
| H  | -5.948475 | -2.117056 | 5.266025  |
| H  | -2.102934 | -0.094495 | 5.341020  |
| H  | -1.687818 | -1.003549 | 7.642948  |
| C1 | -7.141481 | 0.262522  | -0.443181 |
| C1 | -6.392458 | 1.267867  | -3.459429 |
| C  | -5.231089 | -2.668075 | -3.468669 |
| C  | -5.466466 | -1.332643 | -3.845092 |
| C  | -5.606077 | -3.112330 | -2.186142 |
| C  | -6.073192 | -0.461418 | -2.939045 |
| C  | -6.199633 | -2.218746 | -1.278809 |
| C  | -6.421958 | -0.893193 | -1.661539 |
| H  | -4.749816 | -3.348677 | -4.176926 |
| H  | -5.192989 | -0.966914 | -4.834222 |
| H  | -5.426682 | -4.146072 | -1.877562 |
| H  | -6.476173 | -2.535250 | -0.274401 |
| C1 | -2.169305 | 9.601714  | -3.510999 |
| C1 | -5.143733 | 8.396894  | -2.803971 |
| C  | -4.407603 | 6.933238  | -6.571076 |
| C  | -5.017873 | 7.237190  | -5.337812 |
| C  | -3.143895 | 7.463348  | -6.881266 |
| C  | -4.351389 | 8.065818  | -4.430671 |
| C  | -2.480622 | 8.293809  | -5.957173 |
| C  | -3.093022 | 8.584668  | -4.734437 |
| H  | -4.920622 | 6.266354  | -7.273111 |
| H  | -5.994885 | 6.819786  | -5.072442 |
| H  | -2.648794 | 7.205073  | -7.823287 |
| H  | -1.485757 | 8.698032  | -6.173705 |
| C1 | 4.394089  | 0.274311  | -5.081908 |
| C1 | 3.623407  | -2.866564 | -4.575311 |
| C  | 5.427598  | -1.771988 | -1.068195 |
| C  | 4.758353  | -2.502654 | -2.069309 |
| C  | 5.818493  | -0.444817 | -1.304645 |
| C  | 4.478402  | -1.887587 | -3.290349 |

|    |           |           |           |
|----|-----------|-----------|-----------|
| C  | 5.520067  | 0.165581  | -2.535390 |
| C  | 4.840129  | -0.564304 | -3.512681 |
| H  | 5.648572  | -2.245584 | -0.106425 |
| H  | 4.449755  | -3.539286 | -1.904612 |
| H  | 6.357629  | 0.118423  | -0.540384 |
| H  | 5.808536  | 1.200195  | -2.732979 |
| C1 | 5.500466  | -7.434535 | -0.827012 |
| C1 | 2.675221  | -8.774143 | 0.165100  |
| C  | 2.343890  | -4.868964 | 1.393668  |
| C  | 2.089963  | -6.231792 | 1.161957  |
| C  | 3.547650  | -4.292024 | 0.954266  |
| C  | 3.043128  | -6.999221 | 0.488292  |
| C  | 4.508596  | -5.078996 | 0.296178  |
| C  | 4.241553  | -6.431022 | 0.062038  |
| H  | 1.601132  | -4.272858 | 1.929300  |
| H  | 1.159153  | -6.693177 | 1.503708  |
| H  | 3.753049  | -3.233550 | 1.138400  |
| H  | 5.470587  | -4.659116 | -0.015842 |
| C1 | -1.777025 | -5.509696 | 0.479620  |
| C1 | -2.677449 | -4.943795 | -2.628717 |
| C  | -5.326850 | -7.823194 | -1.396521 |
| C  | -4.637776 | -6.866805 | -2.168389 |
| C  | -4.933907 | -8.073113 | -0.065586 |
| C  | -3.562821 | -6.171261 | -1.600889 |
| C  | -3.851355 | -7.366927 | 0.495433  |
| C  | -3.179263 | -6.421083 | -0.284435 |
| H  | -6.168353 | -8.369361 | -1.838928 |
| H  | -4.924287 | -6.663452 | -3.206431 |
| H  | -5.465629 | -8.814822 | 0.542430  |
| H  | -3.539414 | -7.544264 | 1.528838  |
| C1 | -1.716155 | -1.951400 | -9.454796 |
| C1 | -2.015303 | 1.295183  | -9.359441 |
| C  | 0.885776  | 0.542115  | -6.546200 |
| C  | -0.039457 | 1.194820  | -7.381323 |
| C  | 1.021355  | -0.857685 | -6.595828 |
| C  | -0.811258 | 0.435120  | -8.266062 |
| C  | 0.232660  | -1.610807 | -7.486558 |
| C  | -0.680561 | -0.951797 | -8.316930 |
| H  | 1.500665  | 1.133213  | -5.860720 |
| H  | -0.165922 | 2.280289  | -7.340462 |
| H  | 1.738965  | -1.365654 | -5.944532 |
| H  | 0.319362  | -2.700224 | -7.535438 |
| C1 | 1.503623  | 7.695468  | -3.557622 |
| C1 | 4.181035  | 8.493756  | -1.929863 |
| C  | 4.889578  | 4.586648  | -2.982867 |
| C  | 5.013749  | 5.871026  | -2.416201 |
| C  | 3.740700  | 4.240132  | -3.711269 |
| C  | 3.981709  | 6.792586  | -2.603745 |
| C  | 2.695765  | 5.169013  | -3.872001 |
| C  | 2.833548  | 6.442238  | -3.316949 |
| H  | 5.703931  | 3.869462  | -2.850919 |
| H  | 5.908353  | 6.166022  | -1.856951 |
| H  | 3.655290  | 3.247758  | -4.162906 |
| H  | 1.795796  | 4.904145  | -4.434874 |
| C1 | -2.439228 | -3.700356 | 4.192025  |
| C1 | -0.210446 | -6.025746 | 3.821968  |
| C  | -3.729090 | -8.141173 | 3.965055  |
| C  | -2.362989 | -7.805361 | 3.877130  |

|    |           |           |           |
|----|-----------|-----------|-----------|
| C  | -4.695344 | -7.131084 | 4.132705  |
| C  | -1.985269 | -6.461959 | 3.942723  |
| C  | -4.299369 | -5.781941 | 4.211389  |
| C  | -2.942662 | -5.464420 | 4.104184  |
| H  | -4.029530 | -9.194081 | 3.908705  |
| H  | -1.596516 | -8.578969 | 3.757937  |
| H  | -5.758969 | -7.385356 | 4.210537  |
| H  | -5.035101 | -4.987302 | 4.366473  |
| Cl | 7.554432  | 0.568365  | -7.057341 |
| Cl | 6.249642  | -2.416560 | -7.208618 |
| C  | 7.719097  | -2.243271 | -3.375015 |
| C  | 7.105738  | -2.685299 | -4.562268 |
| C  | 8.245593  | -0.941313 | -3.295325 |
| C  | 7.045231  | -1.825933 | -5.663356 |
| C  | 8.180634  | -0.082199 | -4.410792 |
| C  | 7.586930  | -0.542836 | -5.589155 |
| H  | 7.772025  | -2.916895 | -2.513261 |
| H  | 6.676592  | -3.689924 | -4.637638 |
| H  | 8.705344  | -0.583377 | -2.367067 |
| H  | 8.590632  | 0.933334  | -4.366516 |

Table S11 Cartesian coordinates (Å) of the CH<sub>4</sub>@C<sub>60</sub> in 1,2-dichlorobenzene model

|   |           |           |           |
|---|-----------|-----------|-----------|
| C | -0.521356 | 0.746817  | -0.272441 |
| H | 0.555596  | 0.870116  | -0.421784 |
| H | -0.704658 | 0.153668  | 0.628180  |
| H | -0.951859 | 0.235748  | -1.139053 |
| H | -0.993334 | 1.727971  | -0.164152 |
| C | 2.005838  | 0.924276  | 2.239102  |
| C | 2.804916  | 0.630612  | 1.062415  |
| C | 1.142482  | -0.046273 | 2.765568  |
| C | 2.690335  | -0.625208 | 0.451437  |
| C | 2.629608  | -0.728862 | -0.992292 |
| C | 2.846980  | 1.828484  | 0.242281  |
| C | 2.797999  | 1.728366  | -1.153339 |
| C | 2.692669  | 0.422861  | -1.782281 |
| C | -0.595881 | 1.656614  | 3.159641  |
| C | 0.290361  | 2.667432  | 2.610543  |
| C | -0.174609 | 0.324760  | 3.243929  |
| C | 1.566153  | 2.306613  | 2.154825  |
| C | 2.076036  | 2.857368  | 0.915438  |
| C | -0.517704 | 3.599325  | 1.844406  |
| C | -0.022225 | 4.119918  | 0.644437  |
| C | 1.300203  | 3.759293  | 0.179004  |
| C | -2.393085 | -0.450439 | 2.494099  |
| C | -2.829764 | 0.933013  | 2.406168  |
| C | -1.090077 | -0.753607 | 2.911588  |
| C | -1.949616 | 1.969833  | 2.741632  |
| C | -1.901207 | 3.170730  | 1.925825  |
| C | -3.708633 | 1.059969  | 1.257849  |
| C | -3.652108 | 2.214933  | 0.467011  |
| C | -2.738819 | 3.292095  | 0.807936  |
| C | -0.911197 | -2.484542 | 1.161557  |
| C | -2.265183 | -2.179755 | 0.734973  |
| C | -0.334997 | -1.796666 | 2.237124  |
| C | -2.990547 | -1.174263 | 1.386206  |
| C | -3.804110 | -0.245278 | 0.625656  |
| C | -2.312264 | -2.280390 | -0.710912 |
| C | -3.091161 | -1.384986 | -1.450968 |

|    |           |           |           |
|----|-----------|-----------|-----------|
| C  | -3.836274 | -0.344371 | -0.769947 |
| C  | 1.798095  | -1.626618 | 1.001913  |
| C  | 1.203522  | -2.355009 | -0.102312 |
| C  | 1.046745  | -1.355904 | 2.149550  |
| C  | -0.126037 | -2.778929 | -0.024438 |
| C  | -0.989860 | -2.652594 | -1.179566 |
| C  | 1.722147  | -1.805513 | -1.336364 |
| C  | 0.890301  | -1.691948 | -2.454477 |
| C  | -0.491481 | -2.130426 | -2.378423 |
| C  | -3.010642 | 0.555615  | -2.772460 |
| C  | -2.575645 | -0.827731 | -2.689597 |
| C  | -1.300663 | -1.192115 | -3.139790 |
| C  | -2.157666 | 1.529572  | -3.303809 |
| C  | -2.819708 | 3.120434  | -1.534465 |
| C  | -3.705516 | 2.113551  | -0.980892 |
| C  | -3.783315 | 0.854728  | -1.583010 |
| C  | -2.059043 | 2.832843  | -2.673982 |
| C  | -0.098915 | 3.974896  | -1.694237 |
| C  | -0.887419 | 4.265977  | -0.508686 |
| C  | -2.226116 | 3.855326  | -0.431393 |
| C  | -0.676543 | 3.267231  | -2.755251 |
| C  | 1.381024  | 1.926681  | -3.017232 |
| C  | 1.980679  | 2.657348  | -1.915471 |
| C  | 1.254709  | 3.663588  | -1.267685 |
| C  | 0.079882  | 2.230020  | -3.435909 |
| C  | -0.413410 | -0.176954 | -3.680466 |
| C  | 0.939188  | -0.488511 | -3.264301 |
| C  | 1.822545  | 0.546820  | -2.937918 |
| C  | -0.835847 | 1.155501  | -3.771515 |
| C1 | 5.871532  | 2.090562  | 6.491080  |
| C1 | 7.454478  | -0.388963 | 5.038937  |
| C  | 4.385905  | -2.270777 | 7.031168  |
| C  | 5.501142  | -2.016083 | 6.208581  |
| C  | 3.751769  | -1.212307 | 7.711146  |
| C  | 5.958520  | -0.701779 | 6.069594  |
| C  | 4.214662  | 0.108762  | 7.552775  |
| C  | 5.309774  | 0.348876  | 6.717829  |
| H  | 4.012005  | -3.295392 | 7.131006  |
| H  | 6.012195  | -2.826954 | 5.679315  |
| H  | 2.888766  | -1.404554 | 8.357006  |
| H  | 3.739212  | 0.943761  | 8.076341  |
| C1 | -7.113479 | 2.996082  | 1.960975  |
| C1 | -9.465875 | 2.934771  | -0.326769 |
| C  | -6.475288 | 5.111599  | -2.117117 |
| C  | -7.679549 | 4.423503  | -1.874184 |
| C  | -5.487708 | 5.179097  | -1.116478 |
| C  | -7.870937 | 3.798922  | -0.636285 |
| C  | -5.698465 | 4.558524  | 0.128923  |
| C  | -6.885759 | 3.852449  | 0.349783  |
| H  | -6.307497 | 5.602167  | -3.080583 |
| H  | -8.465204 | 4.366649  | -2.635979 |
| H  | -4.556082 | 5.716819  | -1.302084 |
| H  | -4.956844 | 4.638571  | 0.928639  |
| C1 | -3.940726 | 2.308907  | 9.011400  |
| C1 | -4.724797 | 5.332561  | 7.981746  |
| C  | -1.621881 | 4.269779  | 5.511752  |
| C  | -2.681241 | 4.971553  | 6.117875  |
| C  | -1.257643 | 2.998451  | 5.987536  |

|    |           |           |           |
|----|-----------|-----------|-----------|
| C  | -3.369550 | 4.385119  | 7.185019  |
| C  | -1.967227 | 2.413407  | 7.050538  |
| C  | -3.026051 | 3.112142  | 7.635648  |
| H  | -1.088807 | 4.721358  | 4.669383  |
| H  | -2.977840 | 5.963420  | 5.762545  |
| H  | -0.421536 | 2.455284  | 5.542786  |
| H  | -1.692208 | 1.428729  | 7.432362  |
| C1 | -9.484796 | -2.377133 | 2.018182  |
| C1 | -6.929023 | -0.740691 | 3.245784  |
| C  | -5.213464 | -4.148736 | 1.710509  |
| C  | -5.414181 | -2.911932 | 2.350801  |
| C  | -6.312951 | -4.863694 | 1.199467  |
| C  | -6.704117 | -2.383878 | 2.446956  |
| C  | -7.613092 | -4.330653 | 1.314977  |
| C  | -7.794802 | -3.084870 | 1.930578  |
| H  | -4.197399 | -4.540095 | 1.616644  |
| H  | -4.565361 | -2.367060 | 2.764636  |
| H  | -6.164924 | -5.834577 | 0.715606  |
| H  | -8.481484 | -4.867033 | 0.916105  |
| C1 | -2.525140 | 6.576056  | 2.872880  |
| C1 | -2.773449 | 7.434979  | -0.238069 |
| C  | 1.277009  | 7.024086  | 0.265957  |
| C  | 0.005800  | 7.222571  | -0.306318 |
| C  | 1.395382  | 6.735584  | 1.640199  |
| C  | -1.127265 | 7.120785  | 0.505718  |
| C  | 0.243822  | 6.613128  | 2.440295  |
| C  | -1.012209 | 6.798012  | 1.854459  |
| H  | 2.169133  | 7.119660  | -0.360880 |
| H  | -0.107292 | 7.459933  | -1.367634 |
| H  | 2.385021  | 6.608239  | 2.090164  |
| H  | 0.317420  | 6.372212  | 3.506544  |
| C1 | 0.339712  | 0.261304  | 9.111236  |
| C1 | 0.897684  | -0.789304 | 6.061693  |
| C  | 2.389841  | 3.032951  | 6.014516  |
| C  | 2.036241  | 1.722952  | 5.644004  |
| C  | 2.093295  | 3.510033  | 7.305223  |
| C  | 1.380434  | 0.904860  | 6.567947  |
| C  | 1.457800  | 2.666501  | 8.237618  |
| C  | 1.114204  | 1.366167  | 7.854544  |
| H  | 2.902293  | 3.677691  | 5.293931  |
| H  | 2.280235  | 1.332778  | 4.653259  |
| H  | 2.361563  | 4.531858  | 7.597637  |
| H  | 1.230252  | 3.012652  | 9.251928  |
| C1 | -2.383549 | -3.313277 | -5.897919 |
| C1 | -5.365123 | -3.480985 | -7.243996 |
| C  | -4.754993 | 0.563650  | -6.802539 |
| C  | -5.322041 | -0.685093 | -7.130659 |
| C  | -3.464659 | 0.623263  | -6.246318 |
| C  | -4.596746 | -1.853367 | -6.866788 |
| C  | -2.741073 | -0.556854 | -6.011717 |
| C  | -3.325155 | -1.789509 | -6.300382 |
| H  | -5.325698 | 1.482744  | -6.976702 |
| H  | -6.324281 | -0.755810 | -7.567830 |
| H  | -3.010802 | 1.582659  | -5.989751 |
| H  | -1.729988 | -0.519755 | -5.606357 |
| C1 | 2.238669  | -3.723675 | 4.675591  |
| C1 | 4.502250  | -5.932294 | 3.909970  |
| C  | 6.104820  | -2.433671 | 2.484876  |

|    |           |           |           |
|----|-----------|-----------|-----------|
| C  | 5.926418  | -3.782130 | 2.847477  |
| C  | 5.113000  | -1.482214 | 2.796917  |
| C  | 4.750187  | -4.163576 | 3.503141  |
| C  | 3.954586  | -1.875104 | 3.488836  |
| C  | 3.775399  | -3.221344 | 3.817894  |
| H  | 7.028236  | -2.123728 | 1.983071  |
| H  | 6.683803  | -4.537609 | 2.611378  |
| H  | 5.246261  | -0.431461 | 2.525040  |
| H  | 3.204521  | -1.142210 | 3.794169  |
| C1 | 2.833708  | 3.593384  | -7.520932 |
| C1 | 2.905083  | 6.797208  | -6.777054 |
| C  | 6.570758  | 5.453973  | -5.505314 |
| C  | 5.445884  | 6.264498  | -5.759308 |
| C  | 6.580606  | 4.107860  | -5.916547 |
| C  | 4.341769  | 5.709005  | -6.410568 |
| C  | 5.453902  | 3.557463  | -6.557736 |
| C  | 4.337254  | 4.365596  | -6.783982 |
| H  | 7.434809  | 5.882465  | -4.984017 |
| H  | 5.425508  | 7.315743  | -5.452787 |
| H  | 7.453865  | 3.471170  | -5.734628 |
| H  | 5.440846  | 2.507204  | -6.862755 |
| C1 | -7.998744 | 5.056442  | 6.070271  |
| C1 | -5.729978 | 5.929112  | 3.889392  |
| C  | -4.523850 | 2.179795  | 5.037782  |
| C  | -4.602194 | 3.425135  | 4.395051  |
| C  | -5.493656 | 1.802991  | 5.982938  |
| C  | -5.650499 | 4.288222  | 4.718140  |
| C  | -6.550832 | 2.677302  | 6.292251  |
| C  | -6.617239 | 3.917590  | 5.648611  |
| H  | -3.693367 | 1.515810  | 4.801377  |
| H  | -3.861878 | 3.719938  | 3.647762  |
| H  | -5.424037 | 0.834993  | 6.487808  |
| H  | -7.312165 | 2.408431  | 7.032745  |
| C1 | 7.868065  | 5.933176  | 0.552332  |
| C1 | 5.107890  | 7.420414  | 1.397570  |
| C  | 6.081186  | 5.293524  | 4.780109  |
| C  | 5.441777  | 6.168030  | 3.878912  |
| C  | 7.234541  | 4.590450  | 4.383206  |
| C  | 5.978472  | 6.333628  | 2.599237  |
| C  | 7.765429  | 4.769652  | 3.090869  |
| C  | 7.134227  | 5.655502  | 2.214604  |
| H  | 5.669182  | 5.160868  | 5.787316  |
| H  | 4.534761  | 6.713615  | 4.164912  |
| H  | 7.727417  | 3.895888  | 5.071936  |
| H  | 8.663298  | 4.231000  | 2.769008  |
| C1 | -0.117063 | -3.865475 | 7.234366  |
| C1 | 1.483496  | -6.706383 | 6.972146  |
| C  | -2.467626 | -7.851599 | 6.996408  |
| C  | -1.058621 | -7.872087 | 6.952629  |
| C  | -3.151924 | -6.628330 | 7.107606  |
| C  | -0.354724 | -6.666346 | 7.026681  |
| C  | -2.430946 | -5.421230 | 7.164247  |
| C  | -1.035457 | -5.453199 | 7.130602  |
| H  | -3.021076 | -8.795447 | 6.941112  |
| H  | -0.509394 | -8.815758 | 6.859550  |
| H  | -4.245652 | -6.599647 | 7.147215  |
| H  | -2.947339 | -4.464185 | 7.228448  |
| C1 | -2.349014 | 5.968831  | -3.206708 |

|    |           |           |           |
|----|-----------|-----------|-----------|
| C1 | -4.459241 | 3.946824  | -4.730582 |
| C  | -1.443318 | 4.425003  | -7.474215 |
| C  | -2.641432 | 4.041224  | -6.842937 |
| C  | -0.517547 | 5.236956  | -6.794648 |
| C  | -2.898516 | 4.476482  | -5.538335 |
| C  | -0.802257 | 5.686414  | -5.492423 |
| C  | -1.995871 | 5.303481  | -4.875158 |
| H  | -1.250025 | 4.097652  | -8.501692 |
| H  | -3.378166 | 3.429617  | -7.372554 |
| H  | 0.416161  | 5.542694  | -7.276860 |
| H  | -0.117264 | 6.353679  | -4.964138 |
| C1 | 0.777838  | -4.822111 | -5.277651 |
| C1 | 1.728795  | -5.065016 | -2.158076 |
| C  | -1.135508 | -7.990867 | -2.483299 |
| C  | -0.123320 | -7.146736 | -1.988750 |
| C  | -1.559935 | -7.876606 | -3.821483 |
| C  | 0.444555  | -6.190674 | -2.837178 |
| C  | -0.971444 | -6.918814 | -4.670135 |
| C  | 0.029177  | -6.082326 | -4.163448 |
| H  | -1.593726 | -8.730623 | -1.816984 |
| H  | 0.222324  | -7.224988 | -0.955753 |
| H  | -2.353982 | -8.525709 | -4.208852 |
| H  | -1.292631 | -6.810220 | -5.712271 |
| C1 | 8.145583  | 0.873376  | 1.421145  |
| C1 | 7.432132  | 2.810788  | -1.114179 |
| C  | 4.630442  | 3.876325  | 1.702114  |
| C  | 5.360833  | 3.782625  | 0.503297  |
| C  | 4.932819  | 3.037481  | 2.785060  |
| C  | 6.412546  | 2.870307  | 0.422251  |
| C  | 5.988595  | 2.114931  | 2.688552  |
| C  | 6.724515  | 2.047042  | 1.503657  |
| H  | 3.826538  | 4.613290  | 1.774496  |
| H  | 5.120457  | 4.423188  | -0.348281 |
| H  | 4.374824  | 3.107064  | 3.722064  |
| H  | 6.270842  | 1.494154  | 3.542829  |
| C1 | -3.060086 | -2.728543 | 9.517323  |
| C1 | -5.796843 | -3.685775 | 7.970058  |
| C  | -4.041715 | -1.118413 | 5.290067  |
| C  | -4.948211 | -1.987496 | 5.922132  |
| C  | -2.834218 | -0.770974 | 5.918869  |
| C  | -4.636113 | -2.490646 | 7.187879  |
| C  | -2.542983 | -1.265735 | 7.202556  |
| C  | -3.458105 | -2.112326 | 7.832788  |
| H  | -4.288667 | -0.723882 | 4.302248  |
| H  | -5.887900 | -2.270301 | 5.437841  |
| H  | -2.108101 | -0.128020 | 5.414797  |
| H  | -1.611383 | -1.012738 | 7.712624  |
| C1 | -7.176861 | 0.248911  | -0.205874 |
| C1 | -6.497096 | 1.344581  | -3.208752 |
| C  | -5.319315 | -2.589014 | -3.347368 |
| C  | -5.564348 | -1.243465 | -3.684050 |
| C  | -5.683874 | -3.073678 | -2.076181 |
| C  | -6.168541 | -0.401359 | -2.748522 |
| C  | -6.270850 | -2.208098 | -1.137499 |
| C  | -6.498622 | -0.873051 | -1.479911 |
| H  | -4.837662 | -3.244667 | -4.078649 |
| H  | -5.295937 | -0.850291 | -4.665034 |
| H  | -5.502828 | -4.115328 | -1.795292 |

|    |           |           |           |
|----|-----------|-----------|-----------|
| H  | -6.536849 | -2.555165 | -0.139986 |
| C1 | -1.744392 | 9.417159  | -4.083201 |
| C1 | -4.794797 | 8.445028  | -3.336294 |
| C  | -4.191388 | 6.868856  | -7.082260 |
| C  | -4.755799 | 7.202607  | -5.835206 |
| C  | -2.915468 | 7.345098  | -7.432588 |
| C  | -4.026686 | 7.998775  | -4.947260 |
| C  | -2.183166 | 8.128271  | -6.519332 |
| C  | -2.745785 | 8.440504  | -5.278136 |
| H  | -4.758425 | 6.236131  | -7.774598 |
| H  | -5.751107 | 6.844905  | -5.552832 |
| H  | -2.478938 | 7.100607  | -8.407000 |
| H  | -1.180127 | 8.492998  | -6.766802 |
| C1 | 4.415383  | 0.302172  | -5.072631 |
| C1 | 3.591735  | -2.828203 | -4.552085 |
| C  | 5.359478  | -1.730184 | -1.031362 |
| C  | 4.699528  | -2.459624 | -2.038376 |
| C  | 5.752663  | -0.403446 | -1.263985 |
| C  | 4.437823  | -1.846736 | -3.264536 |
| C  | 5.474450  | 0.204316  | -2.499777 |
| C  | 4.813026  | -0.526602 | -3.485885 |
| H  | 5.565759  | -2.202251 | -0.066195 |
| H  | 4.382634  | -3.493949 | -1.876166 |
| H  | 6.281822  | 0.161040  | -0.494520 |
| H  | 5.770816  | 1.235812  | -2.693494 |
| C1 | 5.435172  | -7.504576 | -0.839123 |
| C1 | 2.597443  | -8.813877 | 0.160708  |
| C  | 2.280747  | -4.887926 | 1.325494  |
| C  | 2.022024  | -6.253185 | 1.114699  |
| C  | 3.486290  | -4.322466 | 0.877203  |
| C  | 2.973425  | -7.035447 | 0.455741  |
| C  | 4.445876  | -5.124009 | 0.234502  |
| C  | 4.175746  | -6.479259 | 0.023993  |
| H  | 1.538930  | -4.280576 | 1.848855  |
| H  | 1.088168  | -6.705041 | 1.460500  |
| H  | 3.693627  | -3.260154 | 1.036380  |
| H  | 5.407815  | -4.711871 | -0.088065 |
| C1 | -1.780573 | -5.513317 | 0.482699  |
| C1 | -2.744068 | -4.929851 | -2.605811 |
| C  | -5.332706 | -7.854938 | -1.358411 |
| C  | -4.662741 | -6.889136 | -2.134584 |
| C  | -4.927935 | -8.097087 | -0.026295 |
| C  | -3.592834 | -6.179369 | -1.574301 |
| C  | -3.844650 | -7.382670 | 0.523318  |
| C  | -3.190261 | -6.429701 | -0.263188 |
| H  | -6.171297 | -8.411972 | -1.793940 |
| H  | -4.961104 | -6.687777 | -3.169991 |
| H  | -5.449478 | -8.841602 | 0.587865  |
| H  | -3.516455 | -7.560476 | 1.551982  |
| C1 | -1.822122 | -1.932719 | -9.349016 |
| C1 | -2.079226 | 1.315053  | -9.274953 |
| C  | 0.848305  | 0.549229  | -6.492326 |
| C  | -0.078996 | 1.206795  | -7.320583 |
| C  | 0.965958  | -0.852557 | -6.532442 |
| C  | -0.871190 | 0.449827  | -8.189981 |
| C  | 0.156423  | -1.603066 | -7.407231 |
| C  | -0.758217 | -0.938971 | -8.231965 |
| H  | 1.478257  | 1.136739  | -5.817484 |



|    |           |           |           |
|----|-----------|-----------|-----------|
| H  | -0.192760 | 2.293581  | -7.283061 |
| H  | 1.684091  | -1.364741 | -5.885285 |
| H  | 0.226786  | -2.694145 | -7.446059 |
| C1 | 1.601773  | 7.572910  | -3.495725 |
| C1 | 4.433402  | 8.115409  | -2.024176 |
| C  | 4.789300  | 4.220022  | -3.265554 |
| C  | 5.038024  | 5.462968  | -2.654736 |
| C  | 3.584185  | 3.991303  | -3.946207 |
| C  | 4.065650  | 6.461318  | -2.741560 |
| C  | 2.597922  | 4.994545  | -3.999749 |
| C  | 2.854744  | 6.224775  | -3.394407 |
| H  | 5.551218  | 3.440061  | -3.213404 |
| H  | 5.989659  | 5.669479  | -2.151986 |
| H  | 3.403141  | 3.031225  | -4.435932 |
| H  | 1.649776  | 4.814765  | -4.513919 |
| C1 | -2.430900 | -3.735011 | 4.215120  |
| C1 | -0.204653 | -6.051081 | 3.807184  |
| C  | -3.715001 | -8.177806 | 4.003118  |
| C  | -2.351607 | -7.837963 | 3.890139  |
| C  | -4.681581 | -7.170804 | 4.187389  |
| C  | -1.976612 | -6.493329 | 3.951733  |
| C  | -4.288670 | -5.820200 | 4.256272  |
| C  | -2.934480 | -5.499200 | 4.128714  |
| H  | -4.012595 | -9.231963 | 3.954187  |
| H  | -1.585435 | -8.609764 | 3.756072  |
| H  | -5.742983 | -7.428576 | 4.283495  |
| H  | -5.024163 | -5.026732 | 4.418952  |
| C1 | 7.776014  | 0.735578  | -6.837570 |
| C1 | 6.555161  | -2.290016 | -6.745700 |
| C  | 7.974486  | -1.750532 | -2.928990 |
| C  | 7.374390  | -2.303537 | -4.074187 |
| C  | 8.476249  | -0.434760 | -2.957437 |
| C  | 7.309224  | -1.543538 | -5.247856 |
| C  | 8.395840  | 0.326370  | -4.139377 |
| C  | 7.820020  | -0.246985 | -5.279284 |
| H  | 8.032881  | -2.346024 | -2.011775 |
| H  | 6.965468  | -3.319852 | -4.066164 |
| H  | 8.915324  | 0.010893  | -2.057622 |
| H  | 8.782886  | 1.351302  | -4.181302 |
